# Supplementary material for: Anti-Inflammatory Effects of Siegesbeckia orientalis Ethanol Extract in In Vitro and In Vivo Models
Source: PubMed Central journal article supplement (PMC4160630; doi:10.1155/2014/329712), 2014-08-26
Supplement: 329712.f1.pdf [file 329712.f1.pdf]

Supplementary Table  
Chemical compositions of SOE analyzed by GC-MS.

| No. | Component                                         | Rt (min) <sup>a</sup> | R. match | Percentage (%) <sup>b</sup> |
|-----|---------------------------------------------------|-----------------------|----------|-----------------------------|
| 1   | 2-Oxabicyclo[2,2,2]octane-6-ol                    | 20.72                 | 763      | 1.8                         |
| 2   | 2-tert-Butyl-1,4-dimethoxy-benzene                | 23.13                 | 805      | 3.8                         |
| 3   | Caryophyllene                                     | 23.59                 | 866      | 3.1                         |
| 4   | <i>cis</i> - $\alpha$ -Bisabolene                 | 26.57                 | 860      | 4.1                         |
| 5   | [-]-Spathulenol                                   | 27.62                 | 853      | 25.7                        |
| 6   | Caryophyllene oxide                               | 27.95                 | 858      | 46.9                        |
| 7   | <i>cis</i> -Lanceol                               | 29.28                 | 719      | 1.7                         |
| 8   | [Z,Z,Z]-9,12,15-Octadecatrienoic acid ethyl ester | 32.49                 | 736      | 1.2                         |
| 9   | 6,10,14-Trimethyl-2-pentadecanone                 | 33.53                 | 790      | 2.1                         |
| 10  | Hexadecanoic acid ethyl ester                     | 36.93                 | 794      | 9.6                         |

<sup>a</sup>Retention time (min)

<sup>b</sup>Relative percentage calculated by integrated peak area
